# Supplementary material
Source: PubMed Central journal article supplement (PMC2975802)
Supplement: NIHMS219797-supplement-Supp_Table_S1.pdf [file NIHMS219797-supplement-Supp_Table_S1.pdf]

**Table S1.** Bacterial strains, plasmids and primers used in this work.

| <b><i>E. coli:</i></b>      | <b>Relevant genotype:</b>                                                                                                                                                                                         | <b>Source or reference:</b>    |
|-----------------------------|-------------------------------------------------------------------------------------------------------------------------------------------------------------------------------------------------------------------|--------------------------------|
| DH5 $\alpha$                | F-, $\theta$ 80 $\Delta$ <i>lacZ</i> M15 $\Delta$ ( <i>lacZYA-argF</i> )U169 <i>deoR recA1 endA1</i><br><i>hsdR17</i> (r <sub>k</sub> -m <sub>k</sub> +) <i>phoA supE44</i> $\lambda$ - <i>thi-1 gyrA96 relA1</i> | Gibco, BRL                     |
| ER2566                      | F- $\lambda$ - <i>fhuA2</i> [lon] <i>ompT lacZ::T7 geneI gal sulA11</i><br>$\Delta$ ( <i>mcrC-mrr</i> )114::IS10 R( <i>mcr-73::miniTn10</i> )2<br>R( <i>zgb-210::Tn10</i> )1 (Tets) <i>endA1</i> [dcm]            | (Chong & Garcia, 1994)         |
| <b><i>M. smegmatis:</i></b> |                                                                                                                                                                                                                   |                                |
| mc <sup>2</sup> 155         | wild type                                                                                                                                                                                                         | (Snapper <i>et al.</i> , 1990) |
| SMR5                        | mc <sup>2</sup> 155 $\Delta$ <i>rpsL</i>                                                                                                                                                                          | (Sander <i>et al.</i> , 1995)  |
| SMR5 <i>dop</i>             | SMR5 <i>dop::aph</i> ; Kan <sup>r</sup>                                                                                                                                                                           | (Imkamp <i>et al.</i> , 2009)  |
| MsHD396                     | SMR5, pMN-NL-His <sub>6</sub> - <i>pup</i> -GGQ; Hyg <sup>r</sup>                                                                                                                                                 | This work                      |
| MsHD397                     | SMR5, pMN-NL-His <sub>6</sub> - <i>pup</i> -GGE; Hyg <sup>r</sup>                                                                                                                                                 | This work                      |
| MsHD398                     | SMR5 <i>dop</i> , pMN-NL-His <sub>6</sub> - <i>pup</i> -GGQ; Hyg <sup>r</sup> , Kan <sup>r</sup>                                                                                                                  | This work                      |
| MsHD399                     | SMR5 <i>dop</i> , pMN-NL-His <sub>6</sub> - <i>pup</i> -GGE; Hyg <sup>r</sup> , Kan <sup>r</sup>                                                                                                                  | This work                      |
| MsHD206                     | mc <sup>2</sup> 155, pMN-NL-His <sub>6</sub> - <i>pup</i> -GGQ; Hyg <sup>r</sup>                                                                                                                                  | This work                      |

|         |                                                                                    |           |
|---------|------------------------------------------------------------------------------------|-----------|
| MsHD207 | mc <sup>2</sup> 155, pMN-NL- <i>pup</i> -His <sub>6</sub> ; Hyg <sup>r</sup>       | This work |
| MsHD209 | mc <sup>2</sup> 155, pMN-NL-His <sub>6</sub> - <i>pup</i> -G; Hyg <sup>r</sup>     | This work |
| MsHD208 | mc <sup>2</sup> 155, pMN-NL-His <sub>6</sub> - <i>pup</i> -GG; Hyg <sup>r</sup>    | This work |
| MsHD212 | mc <sup>2</sup> 155, pMN-NL-His <sub>6</sub> - <i>pup</i> -GGA; Hyg <sup>r</sup>   | This work |
| MsHD219 | mc <sup>2</sup> 155, pMN-NL-His <sub>6</sub> - <i>pup</i> -AGQ; Hyg <sup>r</sup>   | This work |
| MsHD217 | mc <sup>2</sup> 155, pMN-NL-His <sub>6</sub> - <i>pup</i> -GAQ; Hyg <sup>r</sup>   | This work |
| MsHD213 | mc <sup>2</sup> 155, pMN-NL-His <sub>6</sub> - <i>pup</i> -AAQ; Hyg <sup>r</sup>   | This work |
| MsHD214 | mc <sup>2</sup> 155, pMN-NL-His <sub>6</sub> - <i>pup</i> -AAE; Hyg <sup>r</sup>   | This work |
| MsHD215 | mc <sup>2</sup> 155, pMN-NL-His <sub>6</sub> - <i>pup</i> -GGE; Hyg <sup>r</sup>   | This work |
| MsHD220 | mc <sup>2</sup> 155, pMN-NL-His <sub>6</sub> - <i>pup</i> -GGN; Hyg <sup>r</sup>   | This work |
| MsHD221 | mc <sup>2</sup> 155, pMN-NL-His <sub>6</sub> - <i>pup</i> -GGD; Hyg <sup>r</sup>   | This work |
| MsHD218 | mc <sup>2</sup> 155, pMN-NL-His <sub>6</sub> - <i>pup</i> -GGA5Q; Hyg <sup>r</sup> | This work |
| MsHD216 | mc <sup>2</sup> 155, pMN-NL-His <sub>6</sub> - <i>pup</i> -GFQ; Hyg <sup>r</sup>   | This work |
| MsHD223 | mc <sup>2</sup> 155, pMN-NL-His <sub>6</sub> - <i>pup</i> -GGQG; Hyg <sup>r</sup>  | This work |
| MsHD222 | mc <sup>2</sup> 155, pMN-NL-His <sub>6</sub> - <i>pup</i> -GGQA; Hyg <sup>r</sup>  | This work |
| MsHD225 | mc <sup>2</sup> 155, pMN-NL-His <sub>6</sub> - <i>pup</i> -GGEG; Hyg <sup>r</sup>  | This work |
| MsHD224 | mc <sup>2</sup> 155, pMN-NL-His <sub>6</sub> - <i>pup</i> -GGEA; Hyg <sup>r</sup>  | This work |

***M. tuberculosis:***

|         |                                                                                       |                                   |
|---------|---------------------------------------------------------------------------------------|-----------------------------------|
| H37Rv   | wild type American Type Culture Collection 25618                                      | ATCC                              |
| CDC1551 | wild type                                                                             | W. Bishai collection              |
| MHD2    | <i>pafA282::ΦMycoMarT7</i> ; Kan <sup>r</sup>                                         | (Darwin <i>et al.</i> , 2003)     |
| MHD6    | <i>pafA420::ΦMycoMarT7</i> ; Kan <sup>r</sup>                                         | (Darwin <i>et al.</i> , 2003)     |
| MHD58   | CDC1551 <i>dop::ΦMycoMarT7</i> ; Kan <sup>r</sup>                                     | (Lamichhane <i>et al.</i> , 2003) |
| MHD18   | H37Rv, pMV306; Hyg <sup>r</sup> , Kan <sup>r</sup>                                    | (Darwin <i>et al.</i> , 2003)     |
| MHD525  | H37Rv pMN-NL- <i>His<sub>6</sub>-pup</i> -GGQ; Hyg <sup>r</sup>                       | This work                         |
| MHD531  | H37Rv pMN-NL- <i>His<sub>6</sub>-pup</i> -GGE; Hyg <sup>r</sup>                       | This work                         |
| MHD537  | MHD2 pMN-NL- <i>His<sub>6</sub>-pup</i> -GGQ; Hyg <sup>r</sup> , Kan <sup>r</sup>     | This work                         |
| MHD535  | MHD2 pMN-NL- <i>His<sub>6</sub>-pup</i> -GGE; Hyg <sup>r</sup> , Kan <sup>r</sup>     | This work                         |
| MHD586  | CDC1551 pMN402; Hyg <sup>r</sup>                                                      | This work                         |
| MHD585  | CDC1551 pMN-NL- <i>His<sub>6</sub>-pup</i> -GGQ; Hyg <sup>r</sup>                     | This work                         |
| MHD584  | CDC1551 pMN-NL- <i>His<sub>6</sub>-pup</i> -GGE; Hyg <sup>r</sup>                     | This work                         |
| MHD62   | MHD2, pMV306; Hyg <sup>r</sup> , Kan <sup>r</sup>                                     | (Festa <i>et al.</i> , 2007)      |
| MHD63   | MHD2, pMV- <i>pafA</i> - <i>His<sub>6</sub></i> ; Hyg <sup>r</sup> , Kan <sup>r</sup> | This work                         |

|        |                                                                                       |           |
|--------|---------------------------------------------------------------------------------------|-----------|
| MHD65  | MHD6, pMV- <i>pa</i> fA-His <sub>6</sub> ; Hyg <sup>r</sup> , Kan <sup>r</sup>        | This work |
| MHD273 | MHD2, pMV- <i>pa</i> fA(1-414)-His <sub>6</sub> ; Hyg <sup>r</sup> , Kan <sup>r</sup> | This work |
| MHD259 | MHD2, pMV- <i>pa</i> fA(E9A)-His <sub>6</sub> ; Hyg <sup>r</sup> , Kan <sup>r</sup>   | This work |
| MHD261 | MHD2, pMV- <i>pa</i> fA(E11A)-His <sub>6</sub> ; Hyg <sup>r</sup> , Kan <sup>r</sup>  | This work |
| MHD578 | MHD2, pMV- <i>pa</i> fA(R53E)-His <sub>6</sub> ; Hyg <sup>r</sup> , Kan <sup>r</sup>  | This work |
| MHD579 | MHD2, pMV- <i>pa</i> fA(Y55K)-His <sub>6</sub> ; Hyg <sup>r</sup> , Kan <sup>r</sup>  | This work |
| MHD620 | MHD2, pMV- <i>pa</i> fA(D57N)-His <sub>6</sub> ; Hyg <sup>r</sup> , Kan <sup>r</sup>  | This work |
| MHD263 | MHD2, pMV- <i>pa</i> fA(E63A)-His <sub>6</sub> ; Hyg <sup>r</sup> , Kan <sup>r</sup>  | This work |
| MHD580 | MHD2, pMV- <i>pa</i> fA(H123A)-His <sub>6</sub> ; Hyg <sup>r</sup> , Kan <sup>r</sup> | This work |
| MHD269 | MHD2, pMV- <i>pa</i> fA(R171A)-His <sub>6</sub> ; Hyg <sup>r</sup> , Kan <sup>r</sup> | This work |
| MHD581 | MHD2, pMV- <i>pa</i> fA(R187A)-His <sub>6</sub> ; Hyg <sup>r</sup> , Kan <sup>r</sup> | This work |
| MHD582 | MHD2 pMV- <i>pa</i> fA(H207E)-His <sub>6</sub> ; Hyg <sup>r</sup> , Kan <sup>r</sup>  | This work |
| MHD583 | CDC1551 pMV306; Hyg <sup>r</sup>                                                      | This work |
| MHD375 | MHD58 pMV306; Hyg <sup>r</sup> , Kan <sup>r</sup>                                     | This work |
| MHD376 | MHD58 pMV- <i>dop</i> -His <sub>6</sub> ; Hyg <sup>r</sup> , Kan <sup>r</sup>         | This work |
| MHD559 | MHD58 pMV- <i>dop</i> (E8A)-His <sub>6</sub> ; Hyg <sup>r</sup> , Kan <sup>r</sup>    | This work |
| MHD560 | MHD58 pMV- <i>dop</i> (E10A)-His <sub>6</sub> ; Hyg <sup>r</sup> , Kan <sup>r</sup>   | This work |

|        |                                                                                      |           |
|--------|--------------------------------------------------------------------------------------|-----------|
| MHD607 | MHD58 pMV- <i>dop</i> (D95N)-His <sub>6</sub> ; Hyg <sup>r</sup> , Kan <sup>r</sup>  | This work |
| MHD561 | MHD58 pMV- <i>dop</i> (E100A)-His <sub>6</sub> ; Hyg <sup>r</sup> , Kan <sup>r</sup> | This work |
| MHD629 | MHD58 pMV- <i>dop</i> (R222A)-His <sub>6</sub> ; Hyg <sup>r</sup> , Kan <sup>r</sup> | This work |
| MHD608 | MHD58 pMV- <i>dop</i> (H96V)-His <sub>6</sub> ; Hyg <sup>r</sup> , Kan <sup>r</sup>  | This work |
| MHD563 | MHD58 pMV- <i>dop</i> (R206A)-His <sub>6</sub> ; Hyg <sup>r</sup> , Kan <sup>r</sup> | This work |
| MHD539 | MHD58 pMN-NL-His <sub>6</sub> - <i>pup</i> -GGQ; Hyg <sup>r</sup> , Kan <sup>r</sup> | This work |
| MHD541 | MHD58 pMN-NL-His <sub>6</sub> - <i>pup</i> -GGE; Hyg <sup>r</sup> , Kan <sup>r</sup> | This work |

### Plasmids and primers

(sequences are 5' to 3')

|                                                 |                                                                                                       |                               |
|-------------------------------------------------|-------------------------------------------------------------------------------------------------------|-------------------------------|
| pET24b(+)                                       | For production of C-terminal His <sub>6</sub> epitope-tagged protein; Kan <sup>r</sup>                | Novagen                       |
| pMN402                                          | Hyg <sup>r</sup> ; shuttle plasmid with <i>gfp</i> under the control of the BCG <i>hsp60</i> promoter | (Scholz <i>et al.</i> , 2000) |
| pMV306                                          | Hyg <sup>r</sup> ; Mycobacterial plasmid that integrates at attB site on the Mtb chromosome           | (Stover <i>et al.</i> , 1991) |
| pET24b(+)- <i>pafA</i> (1-414)-His <sub>6</sub> | Rv2098c-f1 GCCTGTTCCAGGTAGGTAGT<br>PafA(1-414)r CGAAGCTTATCACGTCCCGCCTCCTGCG                          |                               |

|                                           |                                                         |                                                |
|-------------------------------------------|---------------------------------------------------------|------------------------------------------------|
| pET24b(+)-His <sub>6</sub> - <i>pup</i>   | Used as template for making <i>pup</i> mutant plasmids. | (Pearce <i>et al.</i> , 2008)                  |
| pMV- <i>pafA</i> -His <sub>6</sub>        | Used as template for making <i>pafA</i> plasmids.       | (Festa <i>et al.</i> , 2007)                   |
| pMV- <i>pafA</i> (1-414)-His <sub>6</sub> | pMV306F                                                 | CGGTTCCCTGGCCTTTTGCTGGCC                       |
|                                           | 414PafA-ClaIr                                           | CGATCGATATCACGTCCCGCCTCCTGCGCGGGCGCTG          |
| pMV- <i>pafA</i> (E9A)-His <sub>6</sub>   | PafA-E9Af                                               | AGCGTCGAATCATGGGCATCGCCACCGAGTTCGGTGTACCTG     |
|                                           | PafA-E9Ar                                               | CAGGTGACACCGAACTCGGTGGCGATGCCCATGATTCGACG      |
| pMV- <i>pafA</i> (E11A)-His <sub>6</sub>  | PafA-E11Af                                              | GAATCATGGGCATCGAAACCGCCTTCGGTGTACCTGCACATT     |
|                                           | PafA-E11Ar                                              | AATGTGCAGGTGACACCGAAGGCGGTTTCGATGCCCATGATTC    |
| pMV- <i>pafA</i> (R53E)-His <sub>6</sub>  | PafA-R53Ef                                              | CGTCTTCCTGCGTAACGGTGCGGAACTGTATCTCGACGTGGGCAG  |
|                                           | PafA-R53Er                                              | CTGCCACGTCGAGATACAGTTCCGCACCGTTACGCAGGAAGACG   |
| pMV- <i>pafA</i> (Y55K)-His <sub>6</sub>  | PafA-Y55Kf                                              | CTGCGTAACGGTGCGCGCCTGAAGCTCGACGTGGGCAGTCATCCCG |
|                                           | PafA-Y55Kr                                              | CGGGATGACTGCCCACGTCGAGCTTCAGGCGCGCACCGTTACGCAG |
| pMV- <i>pafA</i> (D57N)-His <sub>6</sub>  | PafA-D57Nf                                              | CGGTGCGCGCCTGTATCTCAACGTGGGCAGTCATCCCGAGTACG   |
|                                           | PafA-D57Nr                                              | CGTACTCGGGATGACTGCCCACGTTGAGATACAGGCGCGCACCG   |
| pMV- <i>pafA</i> (E63A)-His <sub>6</sub>  | PafA-E63Af                                              | TCGACGTGGGCAGTCATCCCGCCTACGCCACCGCCGAATGCG     |
|                                           | PafA-E63Ar                                              | CGCATTTCGGCGGTGGCGTAGGCGGGATGACTGCCCACGTCG     |
| pMV- <i>pafA</i> (H123A)-His <sub>6</sub> | PafA-R123Af                                             | CGGGCAACTCCTACGGCTGCGCCGAAAACCTACCTGATCGTGCG   |

|                                           |                |                                                 |
|-------------------------------------------|----------------|-------------------------------------------------|
|                                           | PafA-R123Ar    | CGCACGATCAGGTAGTTTTTCGGCGCAGCCGTAGGAGTTGCCCG    |
| pMV- <i>pafA</i> (R171A)-His <sub>6</sub> | PafA-R171Af    | CCACCTACTGCTTAAGCCAAGCCGCCGAACACATTTGGGAGGG     |
|                                           | PafA-R171Ar    | CCCTCCCAAATGTGTTTCGGCGGCTTGGCTTAAGCAGTAGGTGG    |
| pMV- <i>pafA</i> (R187A)-His <sub>6</sub> | PafA-R187Af    | CTCTAGCGCCACGACCCGATCCGCCCCATTATCAACACCCGCGACG  |
|                                           | PafA-R187Ar    | CGTCGCGGGTGTGATAATGGGGGCGGATCGGGTTCGTGGCGCTAGAG |
| pMV- <i>pafA</i> (H207E)-His <sub>6</sub> | PafA-R207Ef    | CGAGAAGTACCGGCGGCTGGAAGTCATCGTCGGCGACTCCAACATG  |
|                                           | PafA-R207Er    | CATGTTGGAGTCGCCGACGATGACTTCCAGCCGCCGGTACTTCTCG  |
| pMV- <i>dop</i> -His <sub>6</sub>         | XbaI-pafDf1    | GATCGTCTAGAACCACCGCCCAGGCGGCCAACATCGGAGCC       |
|                                           | HindIII-pafDr1 | GATCGAAGCTTTTAGCGAGGCTCAGCGGTCAGTTGCTCTAC       |
| pMV- <i>dop</i> (E8A)-His <sub>6</sub>    | PafD-E8Af      | CAGCGGATTATCGGAACGGCCGTCGAGTACGGCATTTCCTCG      |
|                                           | PafD-E8Ar      | CGAGGAAATGCCGTACTCGACGGCCGTTCCGATAATCCGCTG      |
| pMV- <i>dop</i> (E10A)-His <sub>6</sub>   | PafD-E10Af     | GGATTATCGGAACGGAGGTCGCCTACGGCATTTCCTCGCCGTCGG   |
|                                           | PafD-E59Ar     | CCGACGGCGAGGAAATGCCGTAGGCGACCTCCGTTCCGATAATCC   |
| pMV- <i>dop</i> (D95N)-His <sub>6</sub>   | PafD-D95Nf     | CGGGGCGCGGCTGTATGTCAACCACGCGCACCCGGAATACTCCG    |
|                                           | PafD-D95Nr     | CGGAGTATTCCGGGTGCGCGTGGTTGACATACAGCCGCGCCCCG    |
| pMV- <i>dop</i> (E100A)-His <sub>6</sub>  | PafD-E100Af    | ATGTCGACCACGCGCACCCGGCCTACTCCGCGCCCGAATGCACCG   |
|                                           | PafD-E100Ar    | CGGTGCATTCCGGGCGCGGAGTAGGCCGGGTGCGCGTGGTCGACAT  |





|                                             |                 |                                                 |
|---------------------------------------------|-----------------|-------------------------------------------------|
| pMN-NL-His <sub>6</sub> - <i>pup</i> -AAE   | precC_AAE_RV_R  | CCGGATATCTCACTCTGCTGCCTTTTGGACGTATGCGC          |
| pMN-NL-His <sub>6</sub> - <i>pup</i> -GGE   | precC_QtoE_RV_R | CCGGATATCTCACTCTCCGCCCTTTTGGACGTATG             |
| pMN-NL-His <sub>6</sub> - <i>pup</i> -GGN   | precC_QtoN_RV_R | CCGGATATCTCAGTTTCCGCCCTTTTGGACGTATG             |
| pMN-NL-His <sub>6</sub> - <i>pup</i> -GGD   | precC_QtoD_RV_R | CCGGATATCTCAGTCTCCGCCCTTTTGGACGTATG             |
| pMN-NL-His <sub>6</sub> - <i>pup</i> -GGA5Q | precC_A5_RV_R   | CCGGATATCTCACTGTGCTGCTGCTGCTCCGCCCTTTTGGACGTATG |
| pMN-NL-His <sub>6</sub> - <i>pup</i> -GFQ   | precC_GtoF_RV_R | CCGGATATCTCACTGAAAGCCCTTTTGGACGTATGCGC          |
| pMN-NL-His <sub>6</sub> - <i>pup</i> -GGQG  | precC_GGQG_RV_R | CCGGATATCTCATCCCTGTCCGCCCTTTTGGACGTATG          |
| pMN-NL-His <sub>6</sub> - <i>pup</i> -GGQA  | precC_GGQA_RV_R | CCGGATATCTCATGCCTGTCCGCCCTTTTGGACGTATG          |
| pMN-NL-His <sub>6</sub> - <i>pup</i> -GGEG  | precC_GGEG_RV_R | CCGGATATCTCATCCCTCTCCGCCCTTTTGGACGTATG          |
| pMN-NL-His <sub>6</sub> - <i>pup</i> -GGEA  | precC_GGEA_RV_R | CCGGATATCTCATGCCTCTCCGCCCTTTTGGACGTATG          |

## References

- Chong, S. & G. A. Garcia, (1994) A versatile and general prokaryotic expression vector, pLACT7. *Biotechniques* **17**: 686, 688, 690-681.
- Darwin, K. H., S. Ehrt, N. Weich, J.-C. Gutierrez-Ramos & C. F. Nathan, (2003) The proteasome of *Mycobacterium tuberculosis* is required for resistance to nitric oxide. *Science* **302**: 1963-1966.
- Festa, R. A., M. J. Pearce & K. H. Darwin, (2007) Characterization of the proteasome accessory factor (paf) operon in *Mycobacterium tuberculosis*. *J Bacteriol* **189**: 3044-3050.
- Imkamp, F., T. Rosenberger, F. Striebel, P. M. Keller, B. Amstutz, P. Sander & E. Weber-Ban, (2009) Deletion of dop in *Mycobacterium smegmatis* abolishes pupylation of protein substrates in vivo. *Mol Microbiol* **75**: 744-754.
- Lamichhane, G., M. Zignol, N. J. Blades, D. E. Geiman, A. Dougherty, J. Grosset, K. W. Broman & W. R. Bishai, (2003) A postgenomic method for predicting essential genes at subsaturation levels of mutagenesis: application to *Mycobacterium tuberculosis*. *Proc Natl Acad Sci U S A* **100**: 7213-7218.
- Pearce, M. J., J. Mintseris, J. Ferreyra, S. P. Gygi & K. H. Darwin, (2008) Ubiquitin-like protein involved in the proteasome pathway of *Mycobacterium tuberculosis*. *Science* **322**: 1104-1107.
- Sander, P., A. Meier & E. C. Bottger, (1995) rpsL+: a dominant selectable marker for gene replacement in mycobacteria. *Mol Microbiol* **16**: 991-1000.
- Scholz, O., A. Thiel, W. Hillen & M. Niederweis, (2000) Quantitative analysis of gene expression with an improved green fluorescent protein. *p6. Eur J Biochem* **267**: 1565-1570.
- Snapper, S. B., R. E. Melton, S. Mustafa, T. Kieser & W. R. Jacobs, Jr., (1990) Isolation and characterization of efficient plasmid transformation mutants of *Mycobacterium smegmatis*. *Mol Microbiol* **4**: 1911-1919.
- Stover, C. K., V. F. de la Cruz, T. R. Fuerst, J. E. Burlein, L. A. Benson, L. T. Bennett, G. P. Bansal, J. F. Young, M. H. Lee, G. F. Hatfull & et al., (1991) New use of BCG for recombinant vaccines. *Nature* **351**: 456-460.
